# Supplementary material for: Recognition and cleavage of 5-methylcytosine DNA by bacterial SRA-HNH proteins
Source: PubMed Central journal article supplement — Nucleic Acids Res. 2015 Jan 6;43(2):1147–59. doi: 10.1093/nar/gku1376 (PMC4333417; doi:10.1093/nar/gku1376), 2015-01-06
Supplement: supp_gku1376_nar-02728-v-2014-File010.pdf [file supp_gku1376_nar-02728-v-2014-File010.pdf]

# **Recognition and cleavage of 5-methylcytosine DNA by bacterial SRA-HNH proteins**

Tiesheng Han<sup>1</sup>, Megumu Yamada-Mabuchi<sup>2</sup>, Gong Zhao<sup>1</sup>, Li Li<sup>3</sup>, Guang liu<sup>1</sup>, Hong-Yu Ou<sup>1</sup>, Zixin Deng<sup>1</sup>, Yu Zheng<sup>2,\*</sup> and Xinyi He<sup>1,\*</sup>

<sup>1</sup> State Key Laboratory of Microbial Metabolism, and School of Life Sciences & Biotechnology  
Shanghai Jiao Tong University, 1954 Huashan Road, Shanghai, 200030, China

<sup>2</sup> New England BioLabs, Inc., 240 County Road, Ipswich, MA, 01938, USA.

<sup>3</sup> Engineering Research Center of Industrial Microbiology (Ministry of Education), and College of Life Sciences, Fujian Normal University, Fuzhou, Fujian 350108 (China)

\*For Correspondence:

Xinyi He Tel: (86)-2162932943-2131(EXT) E-mail: xyhe@sjtu.edu.cn

Yu Zheng Tel: (1)-617-417-1366 E-mail: yu.zhengyu@gmail.com

## **SUPPLEMENTARY MATERIAL**

**Supplementary Tables**

**Supplementary Figure S1-19**

**Supplementary methods**

## Supplementary Tables

**Table S1. Strains and plasmids used in this study.**

| STRAINS                 | CHARACTERISTICS                                                                                                                                                                                                                                                                | REFERENCE  |
|-------------------------|--------------------------------------------------------------------------------------------------------------------------------------------------------------------------------------------------------------------------------------------------------------------------------|------------|
| <i>Escherichia coli</i> |                                                                                                                                                                                                                                                                                |            |
| DH10B                   | F- <i>mcrA</i> $\Delta$ ( <i>mrr</i> - <i>hsdRMS</i> - <i>mcrBC</i> ) $\phi$ 80/ <i>lacZ</i> $\Delta$ M15 $\Delta$ <i>lacX74</i> <i>recA1</i> <i>endA1</i> <i>araD139</i> $\Delta$ ( <i>ara</i> , <i>leu</i> )7697 <i>galU</i> <i>galK</i> $\lambda$ - <i>rpsL</i> <i>nupG</i> | GIBCO BRL  |
| JTU006                  | DH10B derivative with a <i>dcm</i> gene replaced by <i>aadA</i>                                                                                                                                                                                                                | (1)        |
| BL21(DE3)/pLysS         | F- <i>ompT</i> <i>hsdS</i> ( <i>r<sub>B</sub></i> - <i>m<sub>B</sub></i> -) <i>dcm</i> <i>gal</i> $\lambda$ (DE3) [pLysS Cam <sup>r</sup> ]                                                                                                                                    | Novagen    |
| ER2566                  | F- $\lambda$ - <i>fhuA2</i> [ <i>lon</i> ] <i>ompT</i> <i>lacZ</i> ::T7 gene 1 <i>gal</i> <i>sulA11</i> $\Delta$ ( <i>mcrC</i> - <i>mrr</i> )114::IS10 R( <i>mcr</i> -73::miniTn10-TetS)2 R( <i>zgb</i> -210::Tn10)(TetS) <i>endA1</i> [ <i>dcm</i> ]                          | NEB        |
| ER2984                  | F' <i>proA</i> + <i>B</i> + <i>lacIq</i> $\Delta$ <i>lacZ</i> M15 / <i>fhuA2</i> $\Delta$ ( <i>lac</i> - <i>proAB</i> ) <i>glnV</i> <i>galK16</i> <i>galE15</i> R( <i>zgb</i> -210::Tn10)TetS <i>endA1</i> <i>thi-1</i> $\Delta$ ( <i>hsdS</i> - <i>mcrB</i> )5                | NEB        |
| T7 Express              | <i>fhuA2</i> <i>lacZ</i> ::T7 gene1 [ <i>lon</i> ] <i>ompT</i> <i>gal</i> <i>sulA11</i> R( <i>mcr</i> -73::miniTn10-TetS)2 [ <i>dcm</i> ] R( <i>zgb</i> -210::Tn10--TetS) <i>endA1</i> $\Delta$ ( <i>mcrC</i> - <i>mrr</i> )114::IS10                                          | NEB        |
| PLASMIDS                | CHARACTERISTICS                                                                                                                                                                                                                                                                | REFERENCE  |
| pET44b                  | Expression vector with 6XHis-tag. Amp <sup>r</sup>                                                                                                                                                                                                                             | Novagen    |
| pJTU4356                | pET44b derivative for heterologous expression of Sco5333.                                                                                                                                                                                                                      | This study |
| pJTU4356*               | pJTU4356 with a spontaneous amino acid change of E42G.                                                                                                                                                                                                                         | This study |
| pJTU4356M               | pJTU4356 harbouring triple amino acid changes at HNH domain, namely His228Ala, Asn244Ala and His253Ala                                                                                                                                                                         | This study |
| pJTU4381                | pJTU4356 derivative with a amino acid change at Gly32Ala                                                                                                                                                                                                                       | This study |
| pJTU4382                | pJTU4356 derivative with a amino acid change at Tyr50Ala                                                                                                                                                                                                                       | This study |
| pJTU4383                | pJTU4356 derivative with a amino acid change at His228Ala                                                                                                                                                                                                                      | This study |
| pJTU4384                | pJTU4356 derivative with a amino acid change at His253Ala                                                                                                                                                                                                                      | This study |
| pJTU4386                | pJTU4356 derivative with a amino acid change at Cys252Asp                                                                                                                                                                                                                      | This study |
| pUC18                   | 2686 bp, <i>bla</i> , <i>lacZ</i> $\alpha$ , <i>ori</i> <sup>pMB1</sup>                                                                                                                                                                                                        | (2)        |
| pBR322                  | 4361bp, <i>bla</i> , <i>tet</i> , <i>ori</i> <sup>pMB1</sup>                                                                                                                                                                                                                   | (3)        |
| pTXB1                   | Protein expression vector with <i>Mxe</i> <i>GyrA</i> intein-CBD tag. Amp <sup>r</sup>                                                                                                                                                                                         | (4-5)      |
| pTbis1                  | pTXB1 derivative for over-expression of Tbis1                                                                                                                                                                                                                                  | This study |
| pET15b                  | Protein expression vector with 6xHis-tag. Amp <sup>r</sup>                                                                                                                                                                                                                     | Novagen    |
| pJTU4357                | pET15b derivative for over-expression and purification of Dcm                                                                                                                                                                                                                  | This study |
| pRSFDuet1               | Protein co-expression vector. 3829bp, Kan <sup>r</sup> , <i>ori</i> <sup>RSF</sup>                                                                                                                                                                                             | Novagen    |
| pJTU4385                | pRSFDuet1 derivative for heterologous expression of Dcm.                                                                                                                                                                                                                       | This study |

**Table S2. Primers that are used in this study**

| PRIMERS  | SEQUENCE                                          | USE                                    |
|----------|---------------------------------------------------|----------------------------------------|
| 5333EX-F | gatccatagattggtgagatccctg                         | to clone <i>sco5333</i> with NdeI site |
| 5333EX-R | gatcctcagctggcgccaacgttcacggt                     | to clone <i>sco5333</i> with XhoI site |
| 219bp-F  | ccctgacgagcatcaciaa                               | to amplify 219bp                       |
| 219bp-R  | cgaacgacctacaccgaact                              | to amplify 219bp                       |
| dcmEX-F  | aattcatatgatgcaggaaaatataatcagt                   | to clone <i>dcm</i> with NdeI site     |
| dcmEX-R  | agaattcttatcgtgaacgtcgcc                          | to clone <i>dcm</i> with EcoRI site    |
| 5333M-F  | gtacggacgccatgctgtgtctctgccccgaactgtgccgtgatgctcg | to clone pJTU4356M                     |

|         |                                                     |                    |
|---------|-----------------------------------------------------|--------------------|
| 5333M-R | ggtccgggcccgttggtggggcgccccagagcctgaatagcggcgccctcg | to clone pJTU4356M |
| G32A-F  | ccctccaggcagccatctgcggtacg                          | to clone pJTU4381  |
| G32A-R  | ggcgatggacccccggctctgtgggc                          | to clone pJTU4381  |
| Y50A-F  | tatccggcggagccaaggacgacg                            | to clone pJTU4382  |
| Y50A-R  | ccacgatggactctgccccagtcgc                           | to clone pJTU4382  |
| H228A-F | gaaggcgcgctattcaggctctggg                           | to clone pJTU4383  |
| H228A-R | gctatagaaaccgcccagggtctcg                           | to clone pJTU4383  |
| H253A-F | gcccgaactgtgccgtgatgctcg                            | to clone pJTU4384  |
| H253A-R | agagacacagcatgttgcgtaagg                            | to clone pJTU4384  |
| Tbis1-F | ccccccatgtcaccatcaccatcaccataaggcgcacaatacgtgaaattc | to clone pTbis1    |
| Tbis1-R | ccccccgaattctcagcgaggctgggtactgc                    | to clone pTbis1    |

**Table S3. DNA Oligos that are used in this study**

| OLIGOS  | SEQUENCE                                                                   |
|---------|----------------------------------------------------------------------------|
| 55nt-1  | 5-FAM-gaaacccgacaggactataaagata <sup>m</sup> Caggcgtttcccctggaagctccctcgt  |
| 55nt-2  | 5-FAM-gaaacccgacaggactataaagataccaggcgtttcccctggaagctccctcgt               |
| 55nt-3  | acgaggagcttcagggggaaacgc <sup>m</sup> Ctggatctttatagtcctgtcgggttc          |
| 55nt-4  | acgaggagcttcagggggaaacgcctggatctttatagtcctgtcgggttc                        |
| 55nt-5  | 5-FAM-actataaagataccaggcgtttccc <sup>m</sup> Ctgggaagctccctcgtgcctctcctggt |
| 55nt-6  | 5-FAM-actataaagataccaggcgtttcccctggaagctccctcgtgcctctcctggt                |
| 55nt-7  | aacaggagagcgcacgaggagcttc <sup>m</sup> Caggggaaacgcctggatctttatagtc        |
| 55nt-8  | aacaggagagcgcacgaggagcttcagggggaaacgcctggatctttatagtc                      |
| 55nt-9  | 5-FAM-gaaacccgacaggactataaagata <sup>m</sup> Caggcgtttcccctggaagctccctcgt  |
| 55nt-10 | 5-FAM-gaaacccgacaggactataaagata <sup>m</sup> Caggcgtttcccctggaagctccctcgt  |
| 55nt-11 | acgaggagcttcagggggaaacgc <sup>m</sup> Ctgcctatctttatagtcctgtcgggttc        |
| 55nt-12 | acgaggagcttcagggggaaacgcctgctatctttatagtcctgtcgggttc                       |
| 55nt-13 | 5-FAM-gaaacccgacaggactataaagata <sup>m</sup> Caggcgtttcccctggaagctccctcgt  |
| 55nt-14 | 5-FAM-gaaacccgacaggactataaagata <sup>m</sup> Caggcgtttcccctggaagctccctcgt  |
| 55nt-15 | acgaggagcttcagggggaaacgc <sup>m</sup> Ctgcctatctttatagtcctgtcgggttc        |
| 55nt-16 | acgaggagcttcagggggaaacgcctgctatctttatagtcctgtcgggttc                       |
| 55nt-17 | 5-FAM-gaaacccgacaggactataaagata <sup>m</sup> Caggcgtttcccctggaagctccctcgt  |
| 55nt-18 | 5-FAM-gaaacccgacaggactataaagata <sup>m</sup> Caggcgtttcccctggaagctccctcgt  |
| 55nt-19 | acgaggagcttcagggggaaacgc <sup>m</sup> Ctgcctatctttatagtcctgtcgggttc        |
| 55nt-20 | acgaggagcttcagggggaaacgcctgctatctttatagtcctgtcgggttc                       |
| 55nt-21 | 5-FAM-gaaacccgacaggactataaagata <sup>m</sup> Ctggcgtttcccctggaagctccctcgt  |
| 55nt-22 | 5-FAM-gaaacccgacaggactataaagata <sup>m</sup> Ctggcgtttcccctggaagctccctcgt  |
| 55nt-23 | acgaggagcttcagggggaaacgc <sup>m</sup> Caggtatctttatagtcctgtcgggttc         |
| 55nt-24 | acgaggagcttcagggggaaacgc <sup>m</sup> Caggtatctttatagtcctgtcgggttc         |
| 55nt-25 | 5-FAM-gaaacccgacaggactataaagata <sup>m</sup> Cggcgtttcccctggaagctccctcgt   |
| 55nt-26 | 5-FAM-gaaacccgacaggactataaagata <sup>m</sup> Cggcgtttcccctggaagctccctcgt   |
| 55nt-27 | acgaggagcttcagggggaaacgc <sup>m</sup> Cgggtatctttatagtcctgtcgggttc         |
| 55nt-28 | acgaggagcttcagggggaaacgc <sup>m</sup> Cgggtatctttatagtcctgtcgggttc         |

---

55nt-29 5-FAM-gaaacccgacaggactataaagatac<sup>m</sup>Cgggcggtttcccctggaagctccctcgt  
55nt-30 5-FAM-gaaacccgacaggactataaagatac<sup>c</sup>gggcggtttcccctggaagctccctcgt  
55nt-31 acgagggagcttccagggggaaacgc<sup>m</sup>Cggtatctttatagtcctgtcgggttc  
55nt-32 acgagggagcttccagggggaaacgc<sup>c</sup>gggtatctttatagtcctgtcgggttc

---

54nt-1 gaaacccgacaggactataaagatac<sup>m</sup>Cgggcggtttcccctggaagctccctcgt  
54nt-2 gaaacccgacaggactataaagatac<sup>c</sup>gggcggtttcccctggaagctccctcgt  
54nt-3 acgagggagcttccagggggaaacgc<sup>m</sup>Cggtatctttatagtcctgtcgggttc  
54nt-4 acgagggagcttccagggggaaacgc<sup>c</sup>gggtatctttatagtcctgtcgggttc  
56nt-1 cggcgtttccgggttccataggctccgctc<sup>m</sup>Cggcctctgatgaccagggcatcaca  
56nt-2 cggcgtttccgggttccataggctccgctc<sup>c</sup>ggcctctgatgaccagggcatcaca  
56nt-3 tgtgatgcctgggtcatcagaggc<sup>m</sup>Cggagcggagcctatggaacccggaacgccg  
56nt-4 tgtgatgcctgggtcatcagaggc<sup>c</sup>ggagcggagcctatggaacccggaacgccg  
56nt-5 cggcgtttccgggttccataggctccgctc<sup>hm</sup>Cggcctctgatgaccagggcatcaca  
56nt-6 tgtgatgcctgggtcatcagaggc<sup>hm</sup>Cggagcggagcctatggaacccggaacgccg  
66nt-1 aaaaacggcgtttccgggttccataggctccgcac<sup>m</sup>Cggtctctgatgaccagggcatcacatttt-5-FAM  
66nt-2 aaaaacggcgtttccgggttccataggctccgcac<sup>c</sup>ggcctctctgatgaccagggcatcacatttt-5-FAM  
66nt-3 5-FAM-aaaaatgtgatgcctgggtcatcagagac<sup>m</sup>Cggtgaggagcctatggaacccggaacgccgtttt  
66nt-4 5-FAM-aaaaatgtgatgcctgggtcatcagagaccggtgaggagcctatggaacccggaacgccgtttt

---

## REFERENCE

1. Zhou, H., Wang, Y., Yu, Y., Bai, T., Chen, L., Liu, P., Guo, H., Zhu, C., Tao, M. and Deng, Z. (2012) A non-restricting and non-methylating Escherichia coli strain for DNA cloning and high-throughput conjugation to Streptomyces coelicolor. *Current microbiology*, **64**, 185-190.
2. Yanisch-Perron, C., Vieira, J. and Messing, J. (1985) Improved M13 phage cloning vectors and host strains: nucleotide sequences of the M13mp18 and pUC19 vectors. *Gene*, **33**, 103-119.
3. Sutcliffe, J.G. (1978) Nucleotide sequence of the ampicillin resistance gene of Escherichia coli plasmid pBR322. *Proceedings of the National Academy of Sciences of the United States of America*, **75**, 3737-3741.
4. Chong, S., Mersha, F.B., Comb, D.G., Scott, M.E., Landry, D., Vence, L.M., Perler, F.B., Benner, J., Kucera, R.B., Hirvonen, C.A. et al. (1997) Single-column purification of free recombinant proteins using a self-cleavable affinity tag derived from a protein splicing element. *Gene*, **192**, 271-281.
5. Evans, T.C., Jr., Benner, J. and Xu, M.Q. (1998) Semisynthesis of cytotoxic proteins using a modified protein splicing element. *Protein science : a publication of the Protein Society*, **7**, 2256-2264.

## Supplementary Figures:

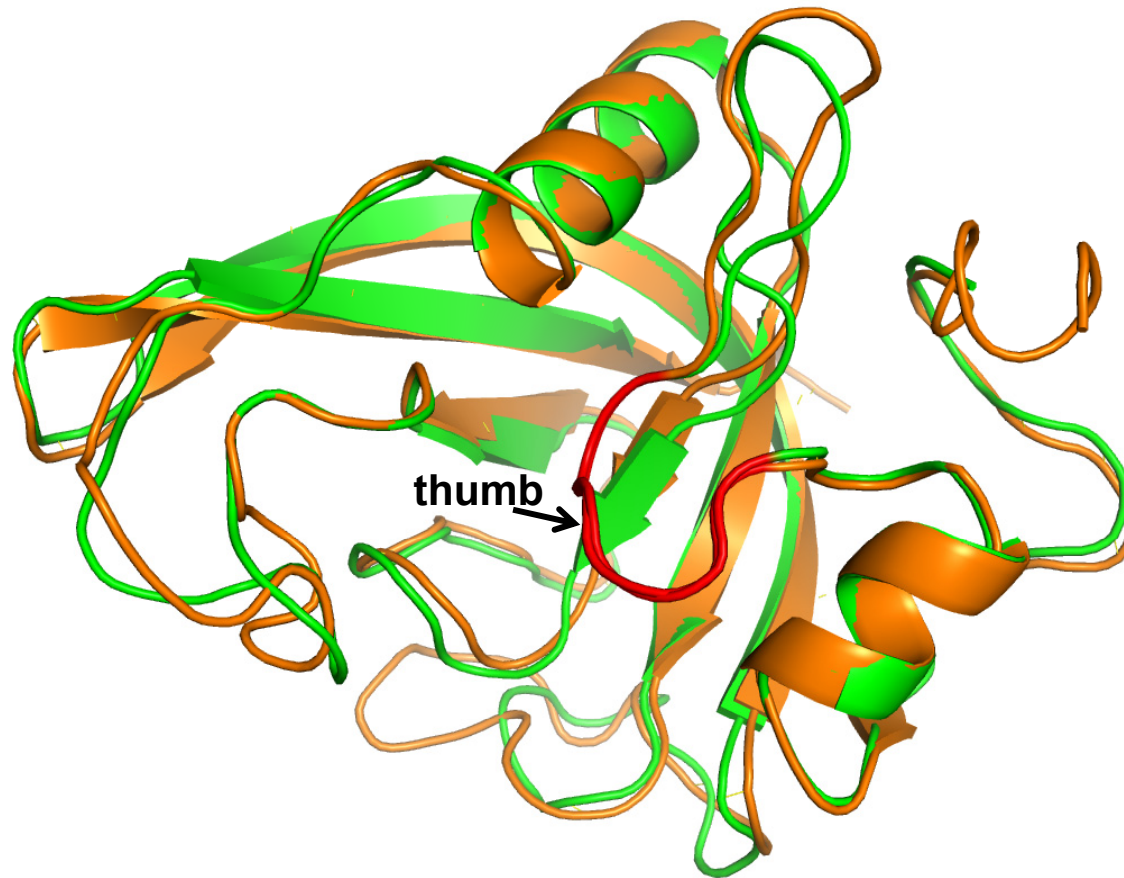

**Figure S1. Superposition of SRA<sub>Tbis1</sub> (Orange) and SRA<sub>5333</sub> (Green)**

The predicted tertiary structure of SRA<sub>Tbis1</sub> (in Orange) and SRA<sub>5333</sub> (in green) are almost identical. The thumb of two complexes is colored in red.

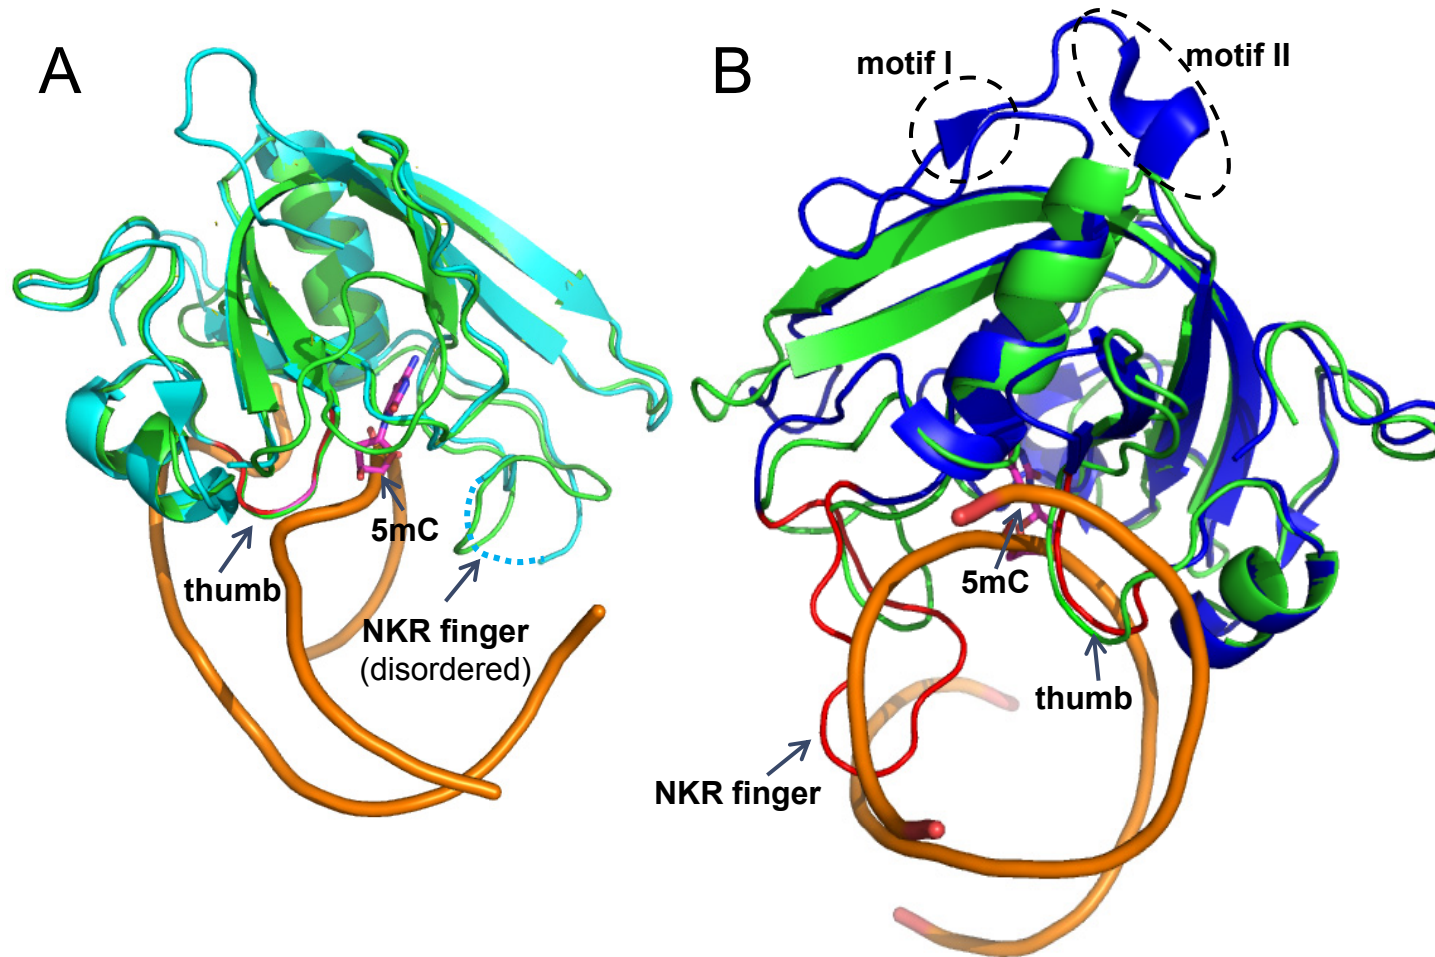

**Figure S2. Superposition of SRA<sub>5333</sub> (Green) to SRA<sub>SUVH5</sub> (Cyan) and SRA<sub>UHRF1</sub> (Blue)**

**A)** Superposition of SRA<sub>5333</sub> (Green) to SRA<sub>SUVH5</sub> (Cyan). The thumb of SRA<sub>SUVH5</sub> is colored in red, and the dotted cyan line represents the disordered NKR finger of SRA<sub>SUVH5</sub>.

**B)** Superposition of SRA<sub>5333</sub> (Green) to SRA<sub>UHRF1</sub> (Blue). The thumb and NKR finger of SRA<sub>UHRF1</sub> is colored in red. The two dotted ellipse designate motif I and motif II of figure 1B.

SRA<sub>5333</sub> is more like SRA<sub>SUVH5</sub> than SRA<sub>UHRF1</sub> according to the much shorter NKR finger and lacking of motif I, II, and III (motif III not shown).

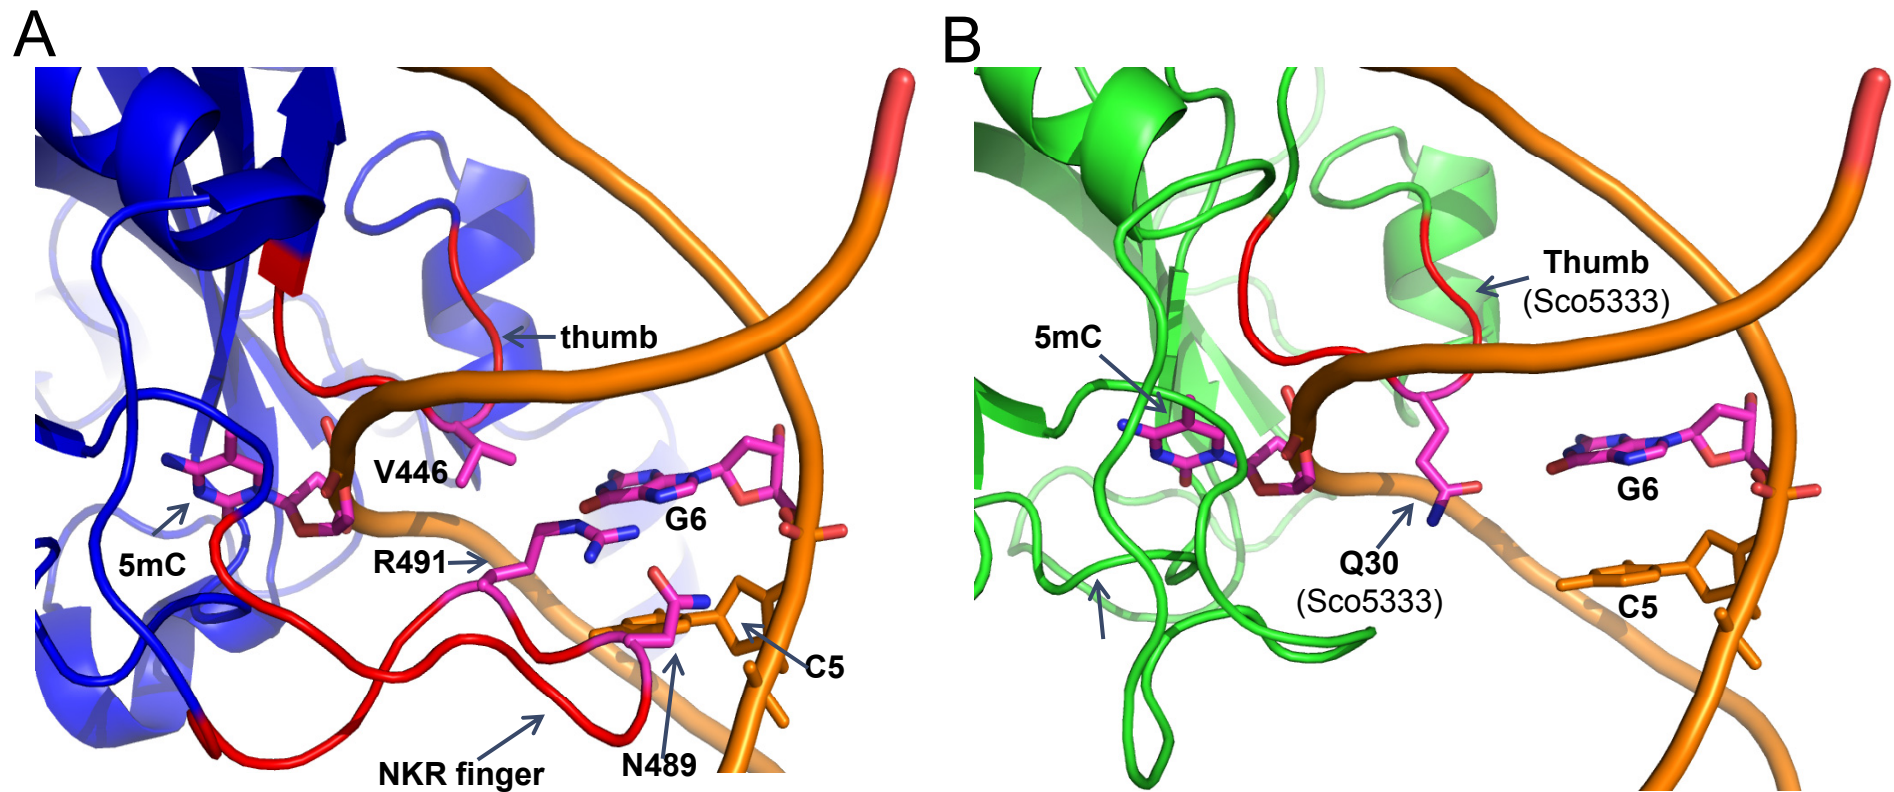

**Figure S3. Thumb and NKR finger comparison between  $SRA_{5333}$  (green) and  $SRA_{UHRF1}$  (blue).**

**A)** Crystal structure of  $SRA_{UHRF1}$  (blue) bound to hemi-methylated DNA. The side chain of R491, which inserts into the DNA duplex, forms intermolecular hydrogen bonds with the Hoogsteen edge of the G6 base. The side chain of N489 prevents potential flipping out of the un-methylated C6 base on the partner strand. V446, which corresponds in sequence to Q392 in the SUVH5 SRA, interacts with the hydrophobic side chain of R491.

**B)** Predicted tertiary structure of  $SRA_{5333}$  (green) after superposition with  $SRA_{UHRF1}$  (blue) bound to hemi-methylated DNA.  $SRA_{5333}$  does not contain a long-enough NKR finger to insert into the major groove of the DNA.

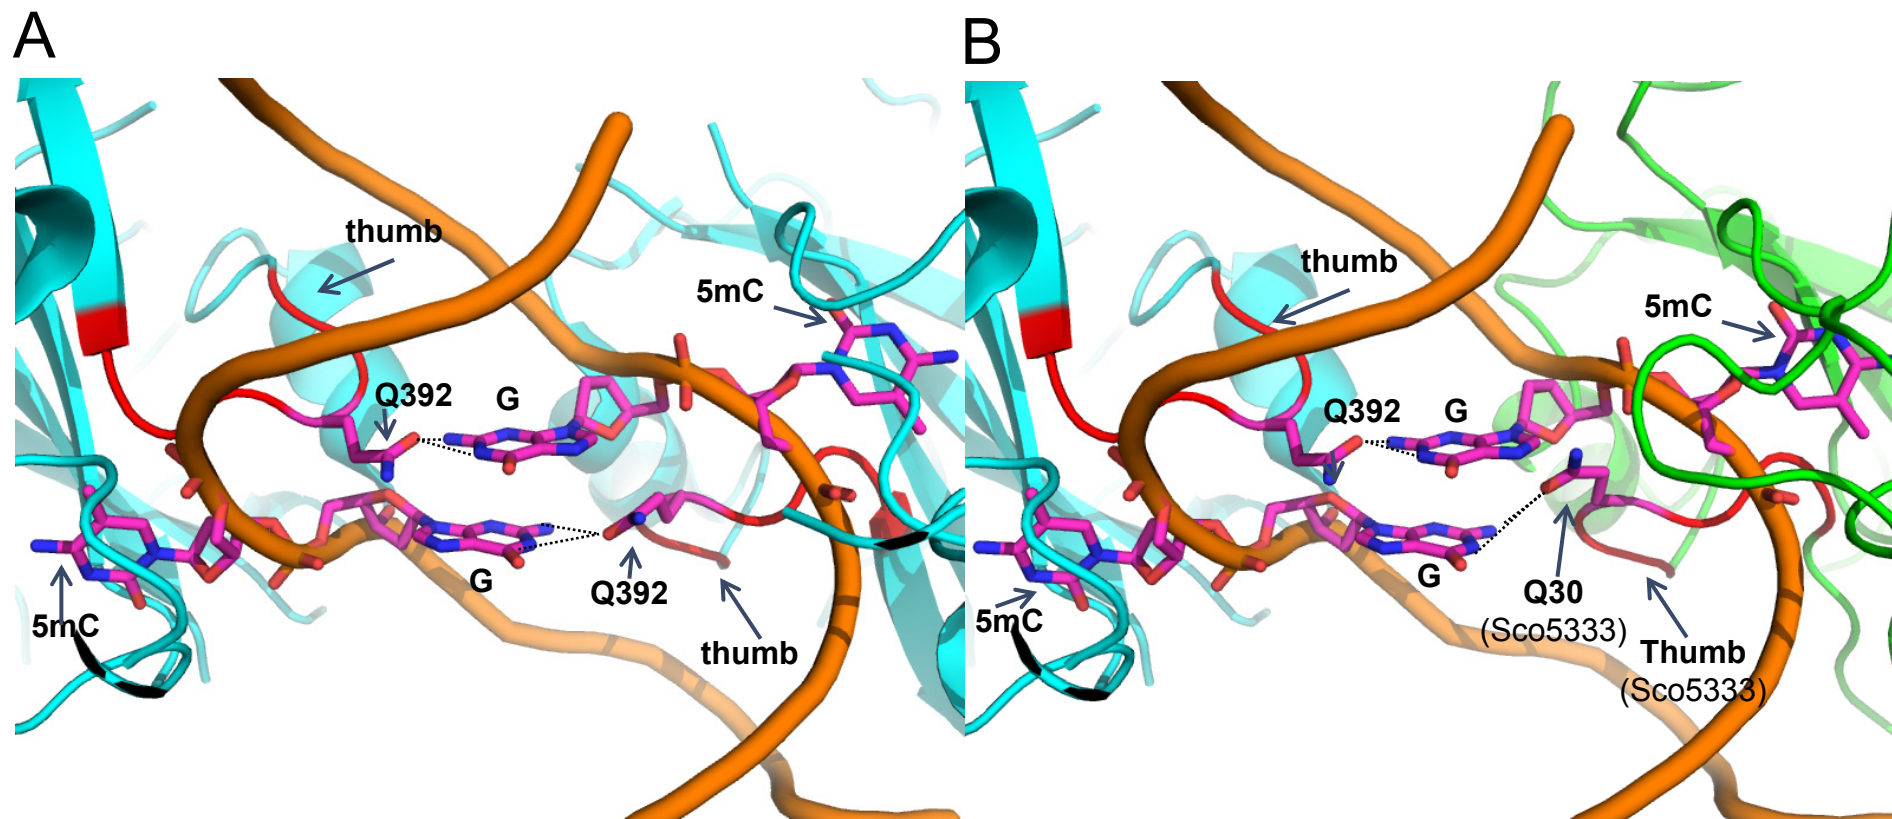

**Figure S4. Thumb comparison between SRA<sub>5333</sub> (green) and SRA<sub>SUVH5</sub> (cyan).**

**A)** Crystal structure of SRA<sub>SUVH5</sub> (cyan) bound to fully-methylated DNA. The SUVH5 SRA domain recognizes the minor groove of the DNA whereas the UHRF1 SRA domain mainly recognizes the major groove of the DNA. The base that inserts into the DNA duplex and replaces the flipped out 5mC is Q392 of the thumb loop in the SUVH5 SRA-DNA complex and R491 of the NKR finger in the UHRF1 SRA-DNA complex.

**B)** Predicted tertiary structure of SRA<sub>5333</sub> (green) after superposition with SRA<sub>SUVH5</sub> (cyan) bound to fully-methylated DNA. SRA<sub>5333</sub> takes the same strategy to flip out 5mC.



**Figure S5. Comparison of predicted tertiary structure of HNH<sub>5333</sub> and HNH<sub>Tbis1</sub> to crystal structure of HNH motif of AnaCas9, Gme and T4eVII.**

Sco5333\_HNH and AnaCas9\_HNH as well as Gme\_HNH and T4eVII contain a HNH motif hybridized with a CCCC type zinc finger, whereas Tbis1\_HNH harbors a ruined CCCD zinc finger, as the red arrow labeled.

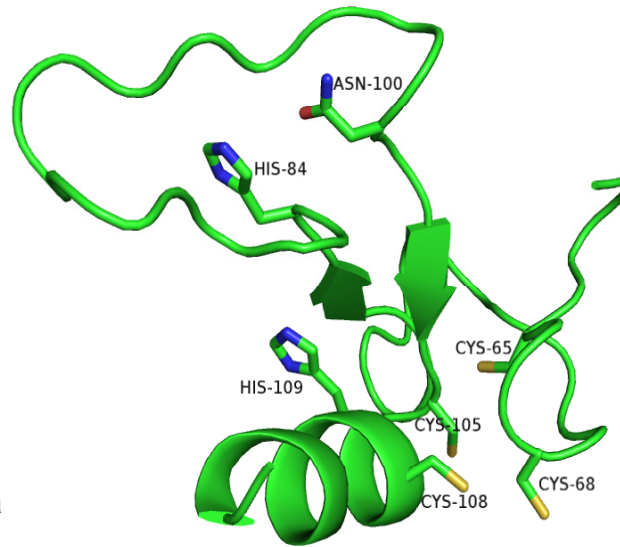

**Sco5333\_HNH**  
Predicted using A145 to Q301

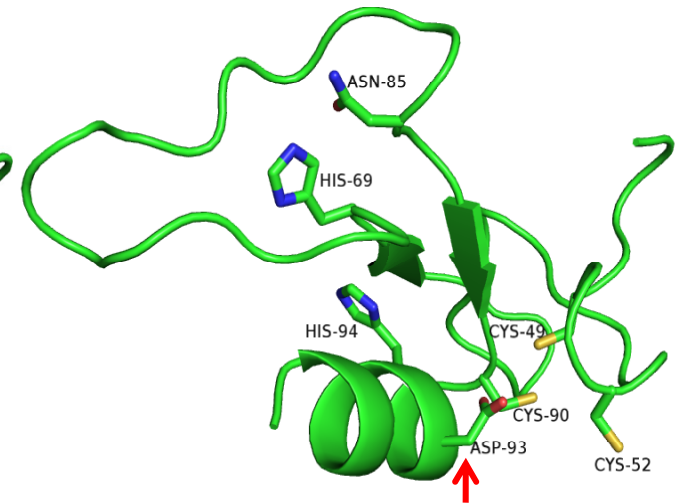

**Tbis1\_HNH**  
Predicted using D161 to R309

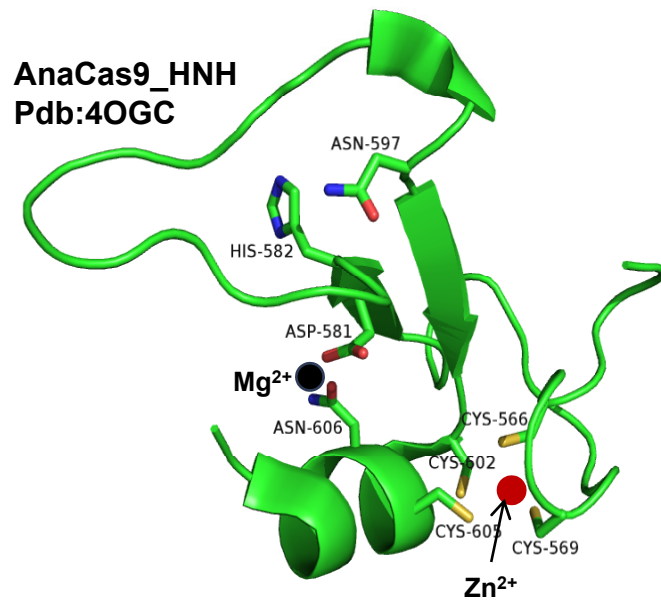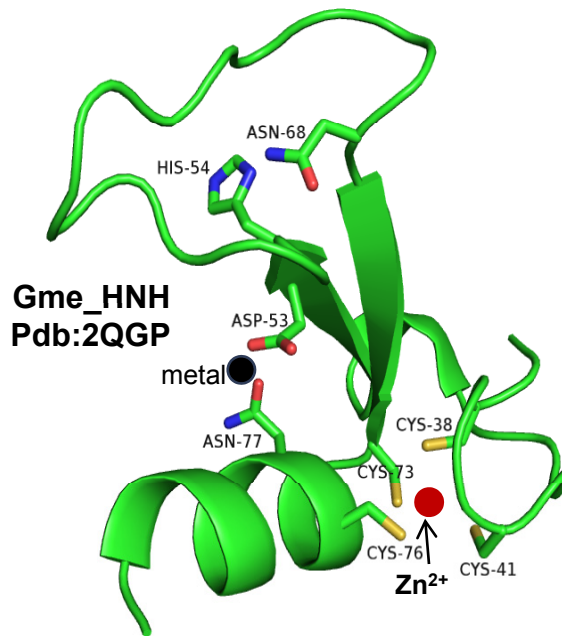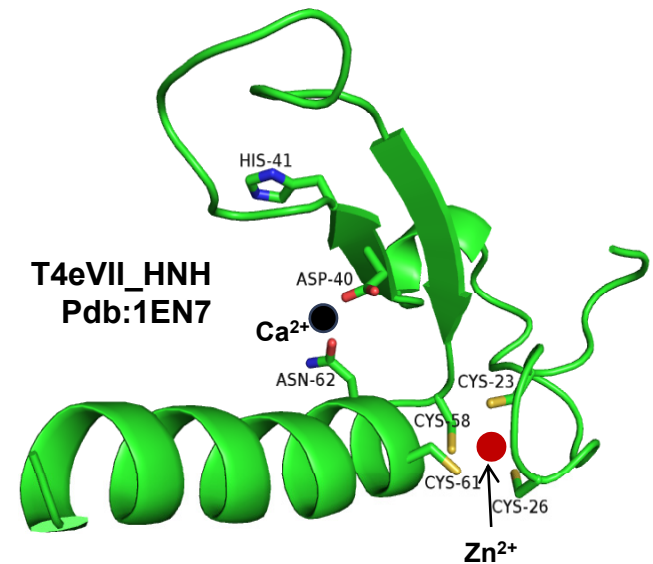

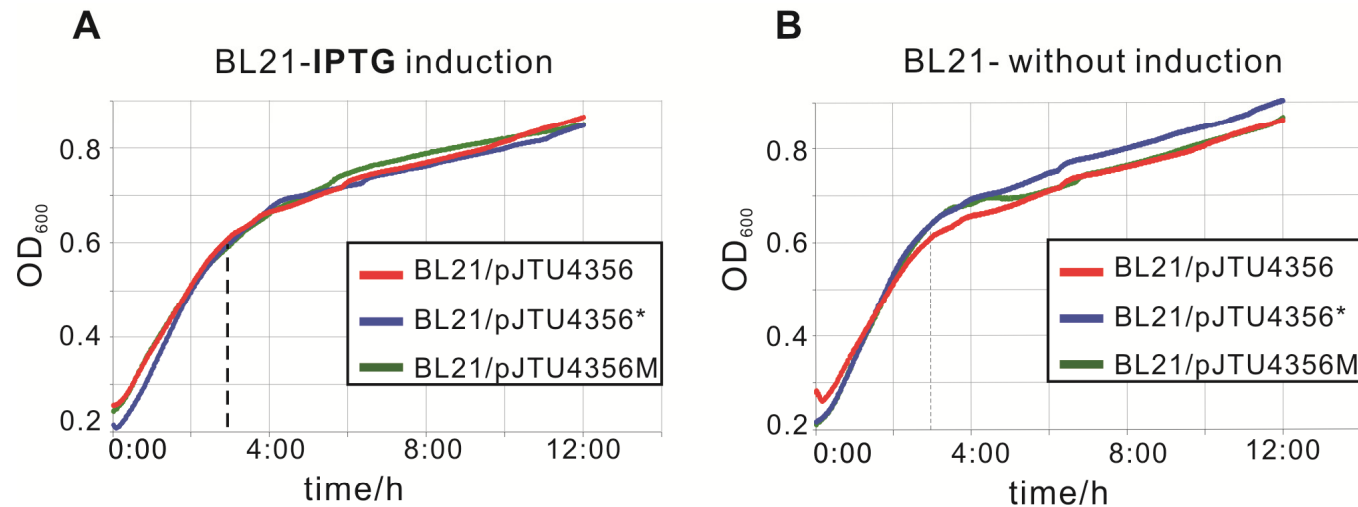

**Figure S6. Growth curve measurement of plasmids encoding Sco5333 and its point-mutants in BL21(DE3)plysS.**

pJTU4356 encoding Sco5333, pJTU4356\* encoding Sco5333<sub>E42G</sub> and pJTU4356M encoding Sco5333<sub>His228Ala,Asn244Ala,His253Ala</sub> are introduced into BL21(DE3)plysS respectively and measured the growth curve using microplate reader under 30 °C. The cell growth shows no distinguishable difference between these three strains whether with IPTG induction or not.

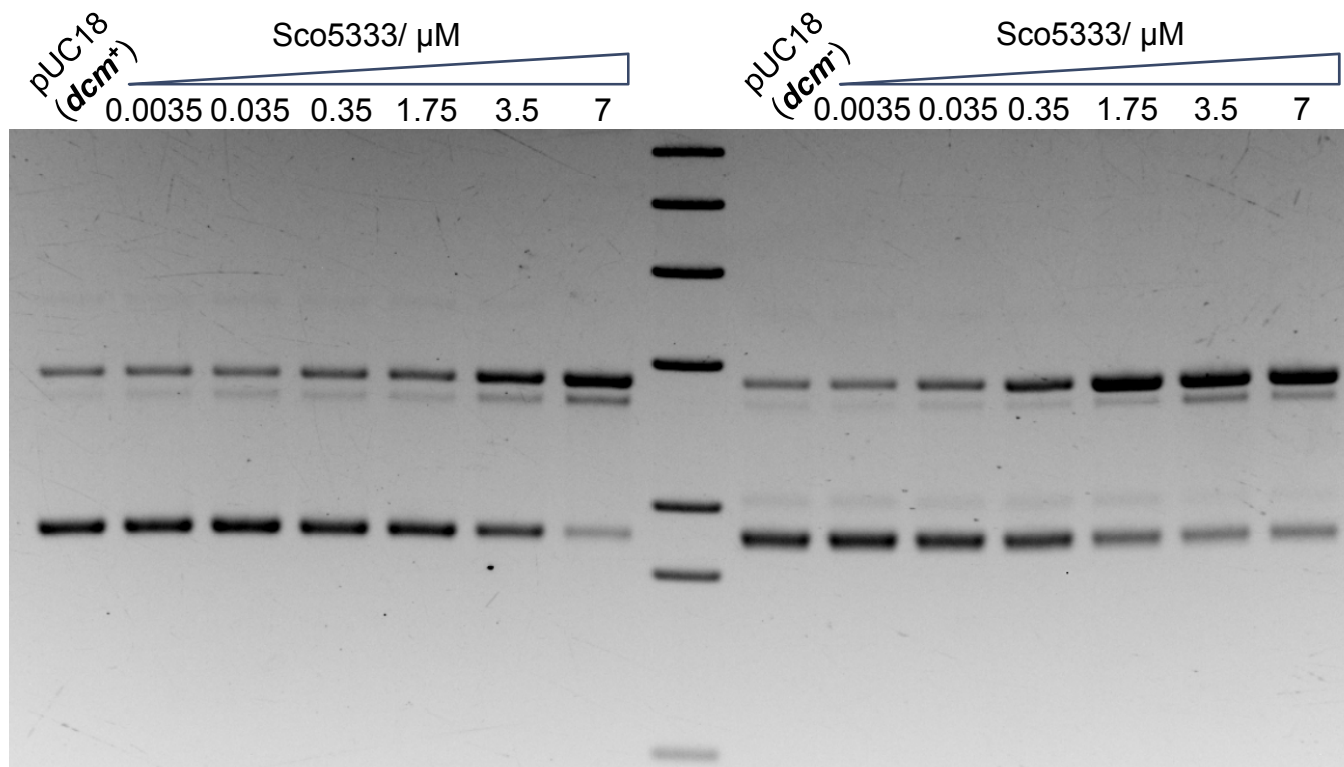

**Figure S7. *In vitro* cleavage activity assays of Sco5333 to Dcm-methylated and non-Dcm methylated pUC18 plasmid DNA in presence of 2mM Mg<sup>2+</sup>.**

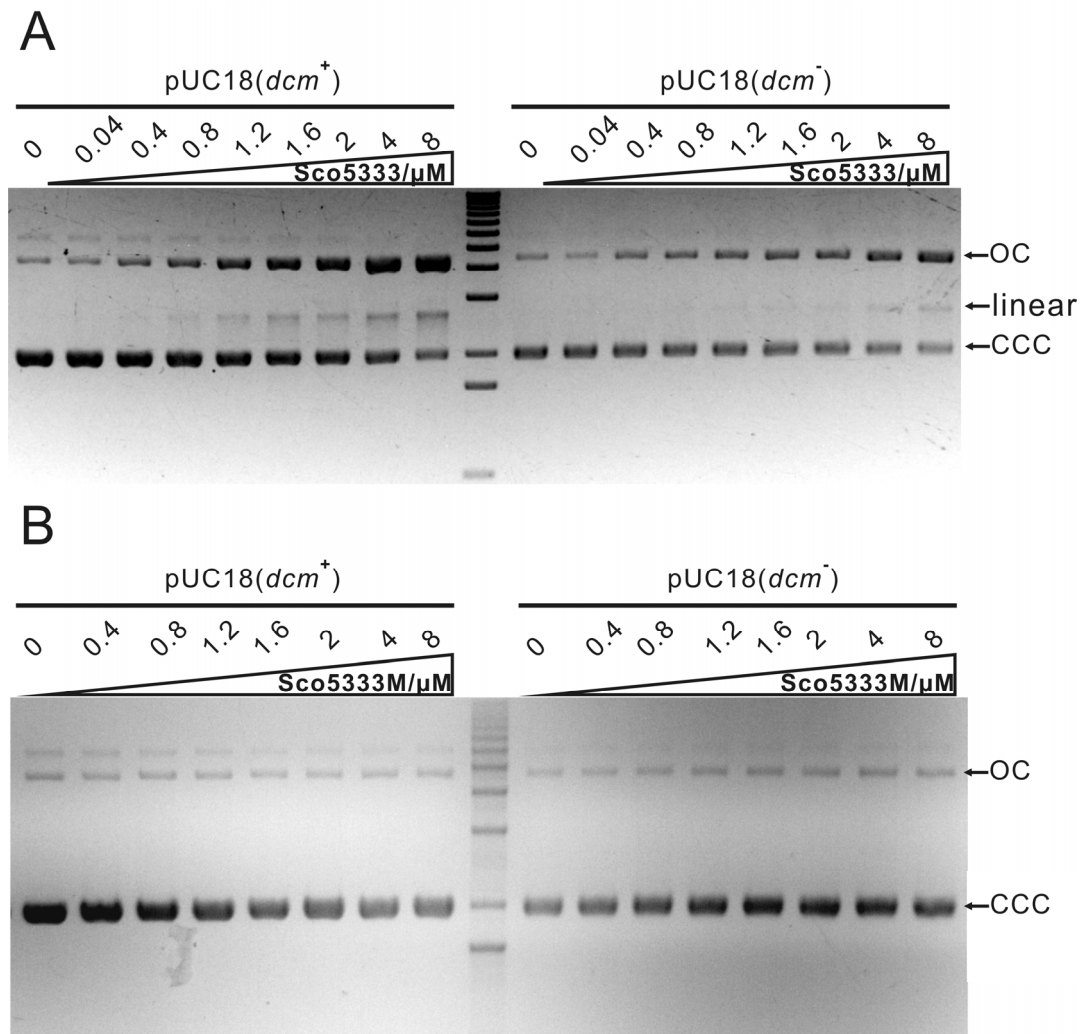

**Figure S8. *In vitro* cleavage activity assays of Sco5333 and Sco5333M to Dcm-methylated and non-Dcm methylated pUC18 plasmid DNA in presence of 2mM Mg<sup>2+</sup>.**

- A)** 0 to 8 μM Sco5333 was added into the reaction system respectively. Weak cleavage activity was observed as concentration of Sco5333 increases.
- B)** 0 to 8 μM Sco5333M(Sco5333 with triple amino acid changes H228A, N244A and H253A) was added into the reaction system respectively. No cleavage activity was showed to both types of DNA.

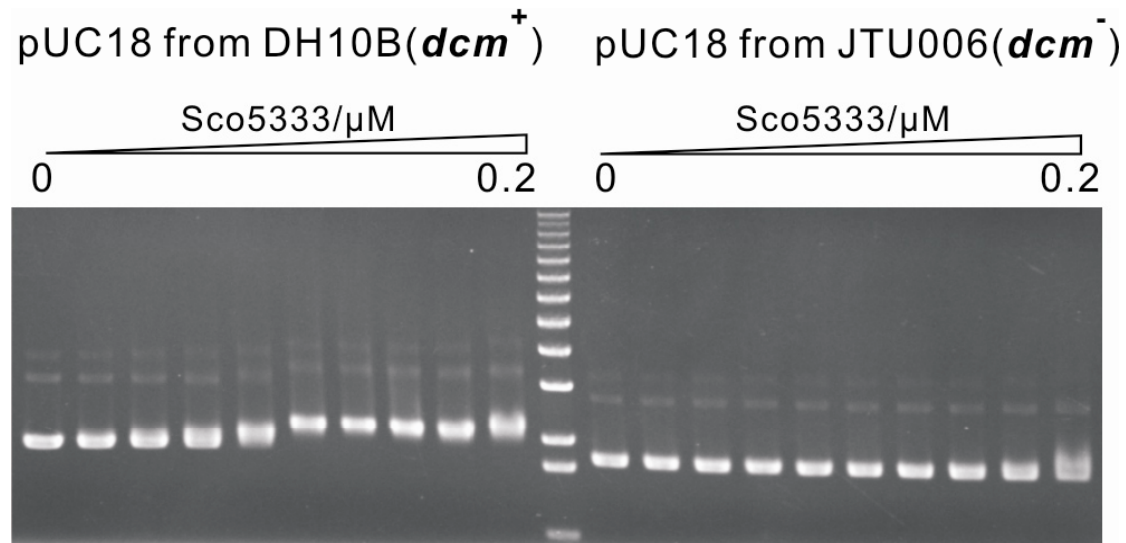

**Figure S9. Titration of Sco5333 to pUC18.**

pUC18 isolated from DH10B (*dcm*<sup>+</sup>) or JTU006 (*dcm*<sup>-</sup>) are performed as the substrate for gradient EMSA of Sco5333(2-folds interval), and Sco5333 shows high specificity to methylated DNA.

Sco5333 cleavage assay  
after proteinase K treatment

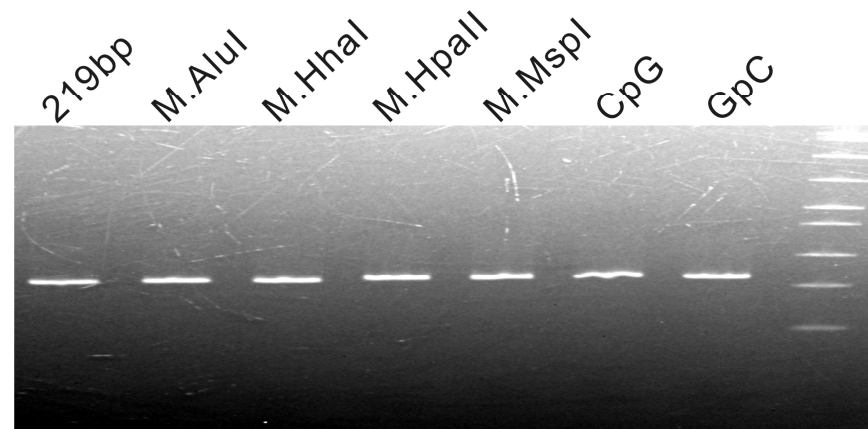

**Figure S10.** *In vitro* cleavage assay of Sco5333 for 219bp modified by six commercial MTases.

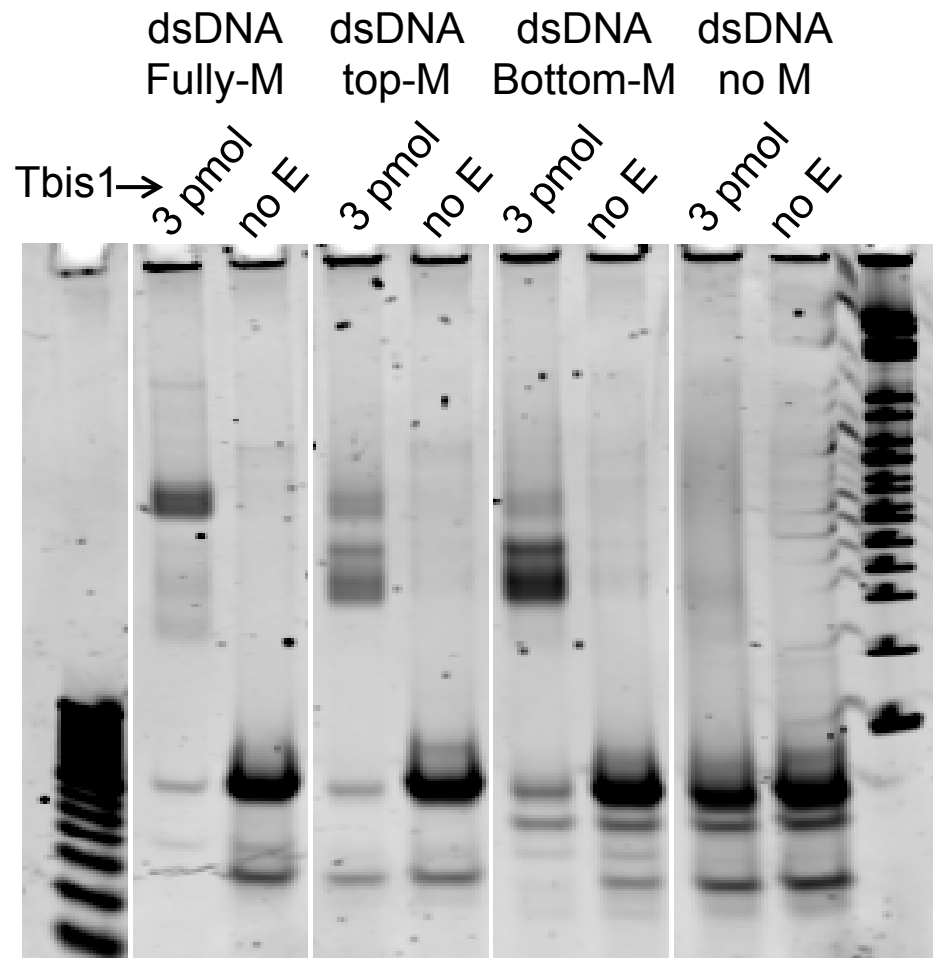

**Figure S11. EMSA of Tbis1 to fully-, top-, bottom- and non-methylated oligos.**

0.6 pmol of fully-, top-, bottom- and non-methylated 56nt double-strand oligos were mixed with 3 pmol Tbis1 in EMSA system respectively.

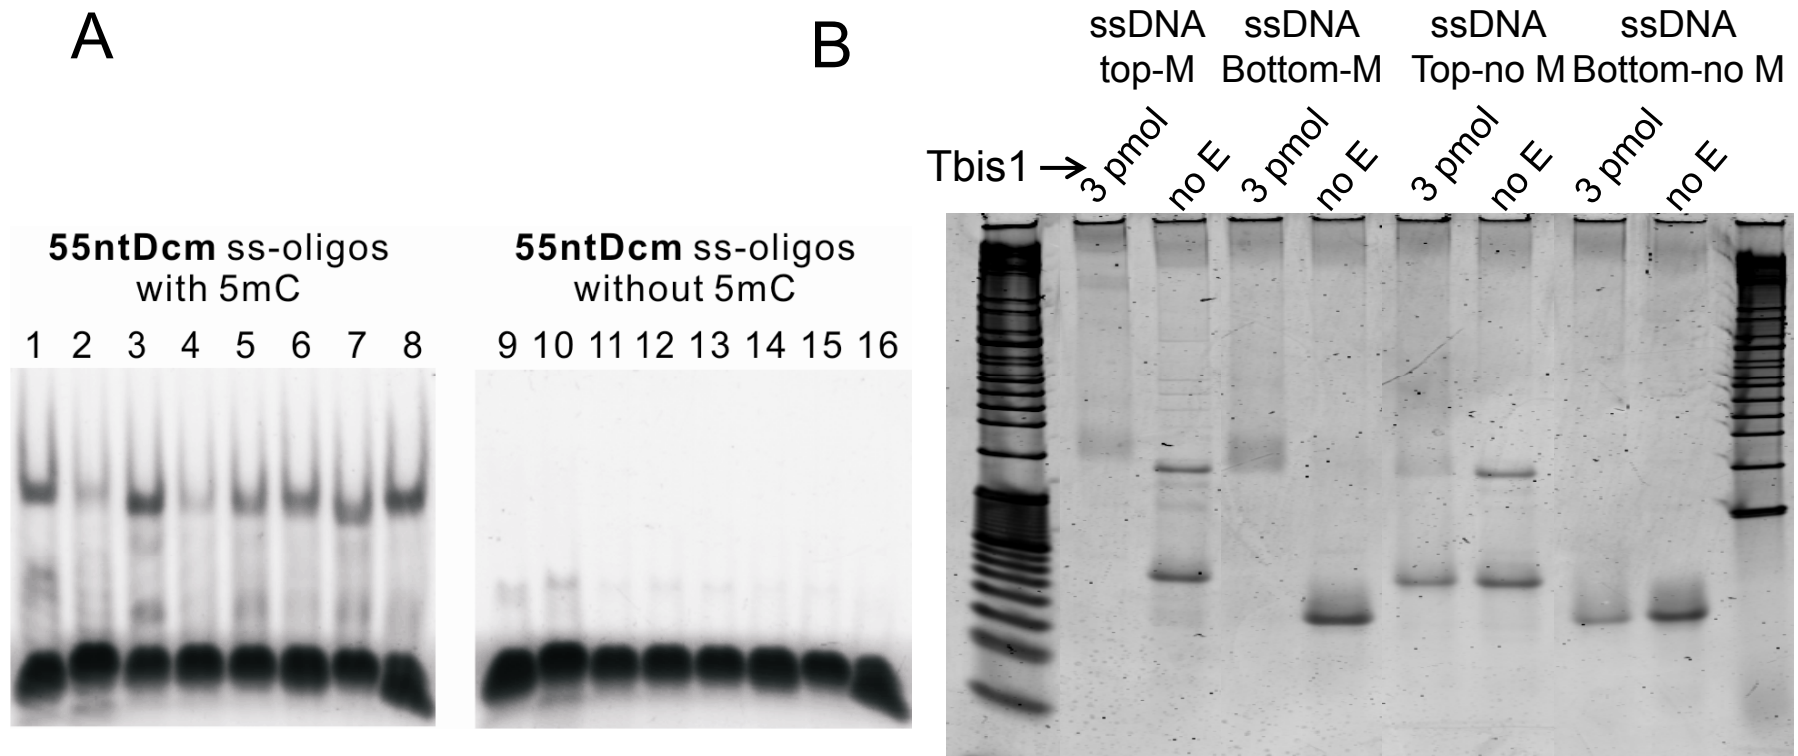

**Figure S12. EMSA of Sco5333 and Tbis1 to single-strand DNA.**

**A)** The single-strand 5-FAM labelled 55nt oligos within or without 5mC were performed as substrates for EMSA of Sco5333. Lane 1 to 16 are: 55nt-1, 55nt-5, 55nt-9, 55nt-13, 55nt-17, 55nt-21, 55nt-25, 55nt-29, 55nt-2, 55nt-6, 55nt-10, 55nt-14, 55nt-18, 55nt-22, 55nt-26, 55nt-30(see table S3)

**B)** The single-strand 56nt oligos within or without 5mC were performed as substrates for EMSA of Tbis1. ssDNA top-M, bottom-M, top-no M, bottom-no M were listed in table S3 as 56nt-1, 56nt-3, 56nt-2 and 56nt-4, respectively.



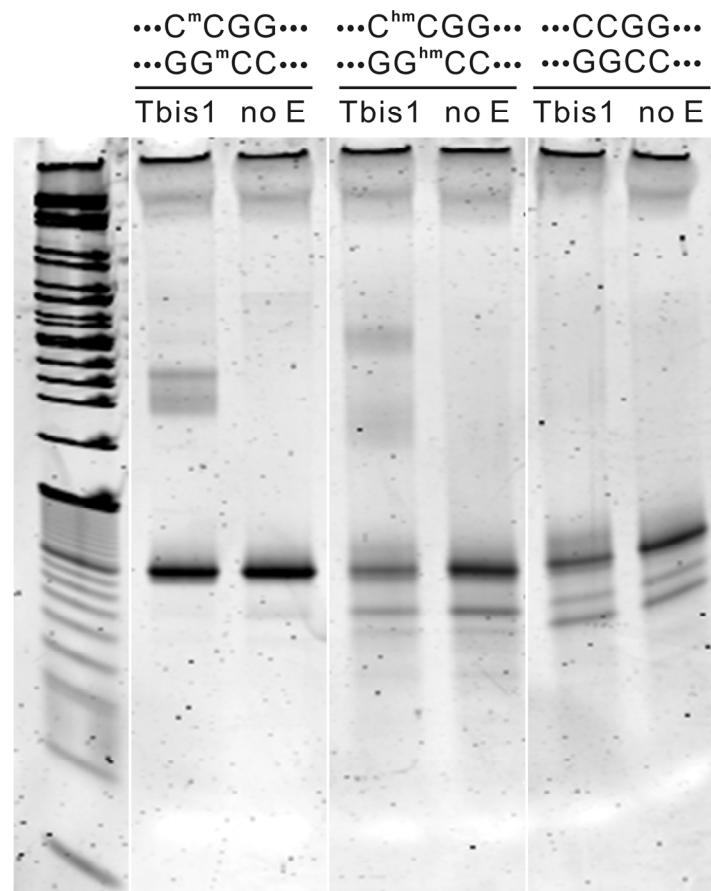

**Figure S13. *In vitro* binding affinity assay of Tbis1 to methylated-, hydroxymethylated and non-methylated ds-DNA.**

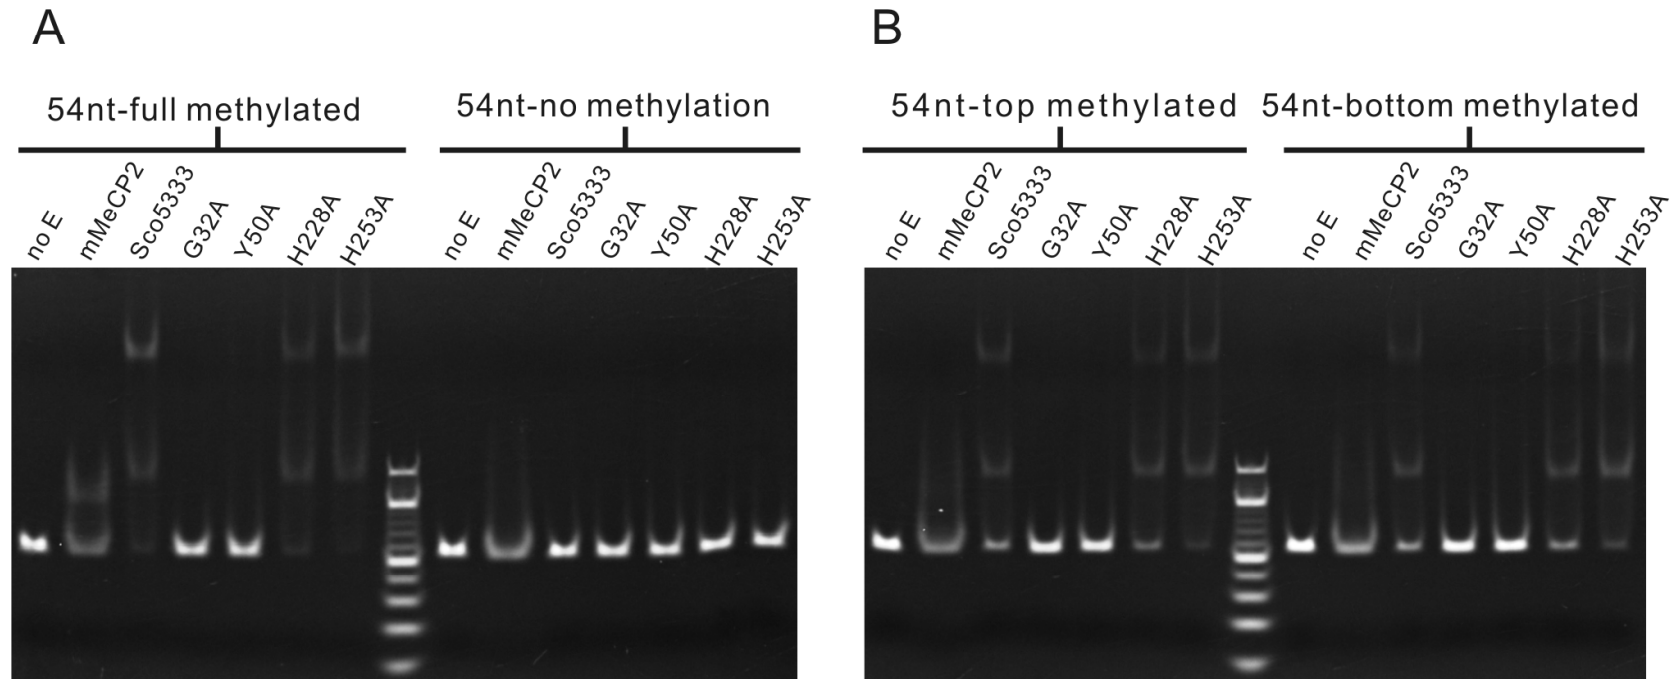

**Figure S14. EMSA of Sco5333 and its single point mutants to 54nt fragments.**

Wild type Sco5333 and its single amino acid change in SRA domain (G32A and Y50A) as well as amino acid change in HNH motif (H228A and H253A) are tested the binding activity to fully-, top-, bottom- and non methylated 54nt fragment which is centred by a C<sup>m</sup>CGG pattern. The MBD domain of mouse MeCP2 is tested in parallel as a control.

**A)** EMSA of MBD<sub>mMeCP2</sub>, Sco5333, G32A, Y50A, H228A and H253A to fully- and non-methylated 54nt fragment.

**B)** EMSA of MBD<sub>mMeCP2</sub>, Sco5333, G32A, Y50A, H228A and H253A to top- and bottom-methylated 54nt fragment.

MeCP2 shows slightly non-specificity to non-methylated 54nt fragment. amino acid changes in SRA domain of Sco5333 lack the DNA binding activity, while amino acid changes in HNH motif retain the binding activity, indicating that its SRA domain that govern the 5mC DNA discrimination and binding.

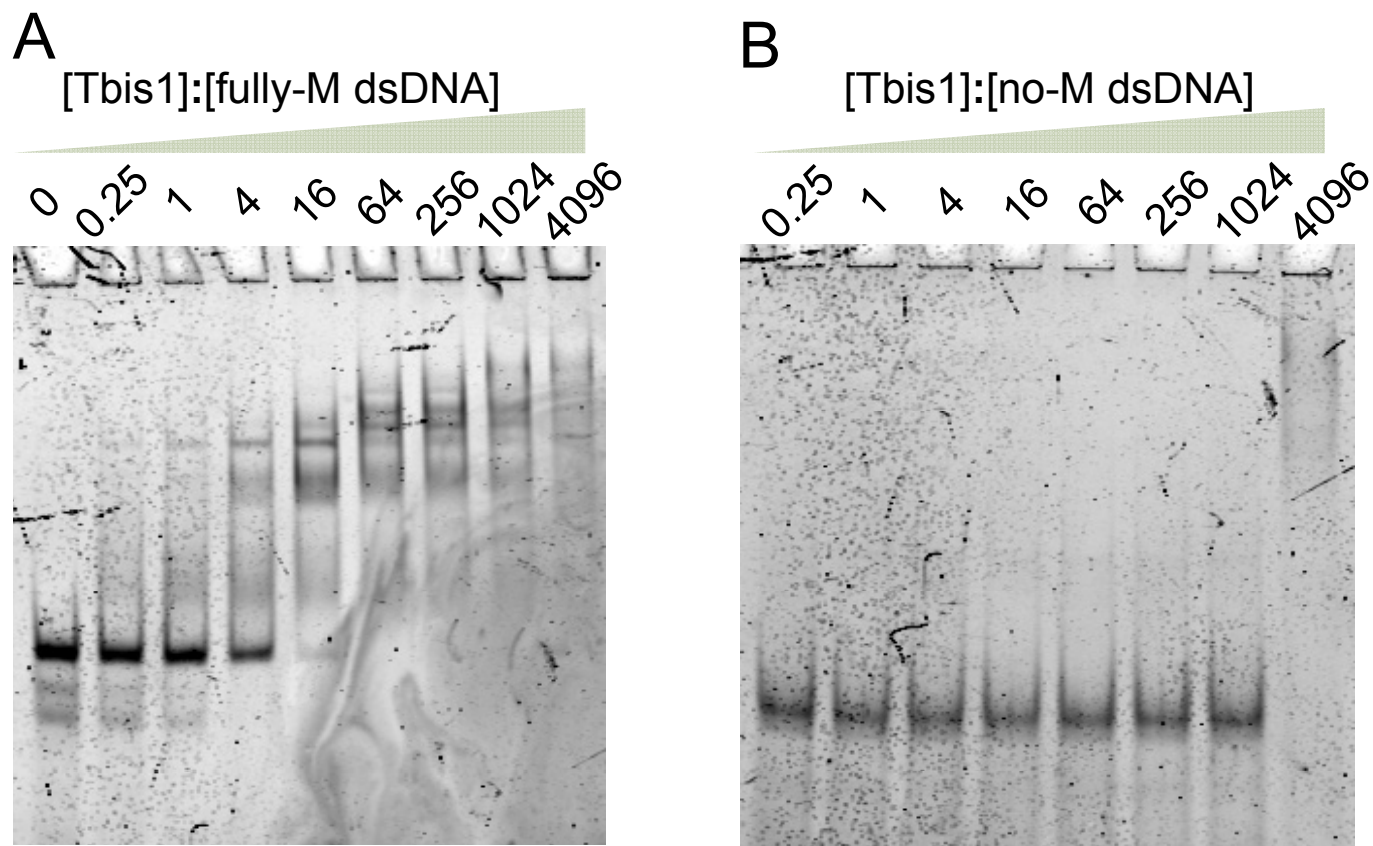

**Figure S15. Titration of Tbis1 to fully- and non-methylated DNA**

The protein:DNA molar ratio is from 0.25 to 4096. In **A**) the fully-methylated showed clear shift bands at protein:DNA molar ratio 1 and 4, while in **B**) is about 4096 for non-methylated DNA, meaning that full length Tbis1 discriminates fully-methylated DNA from non-methylated DNA by >100 folds.

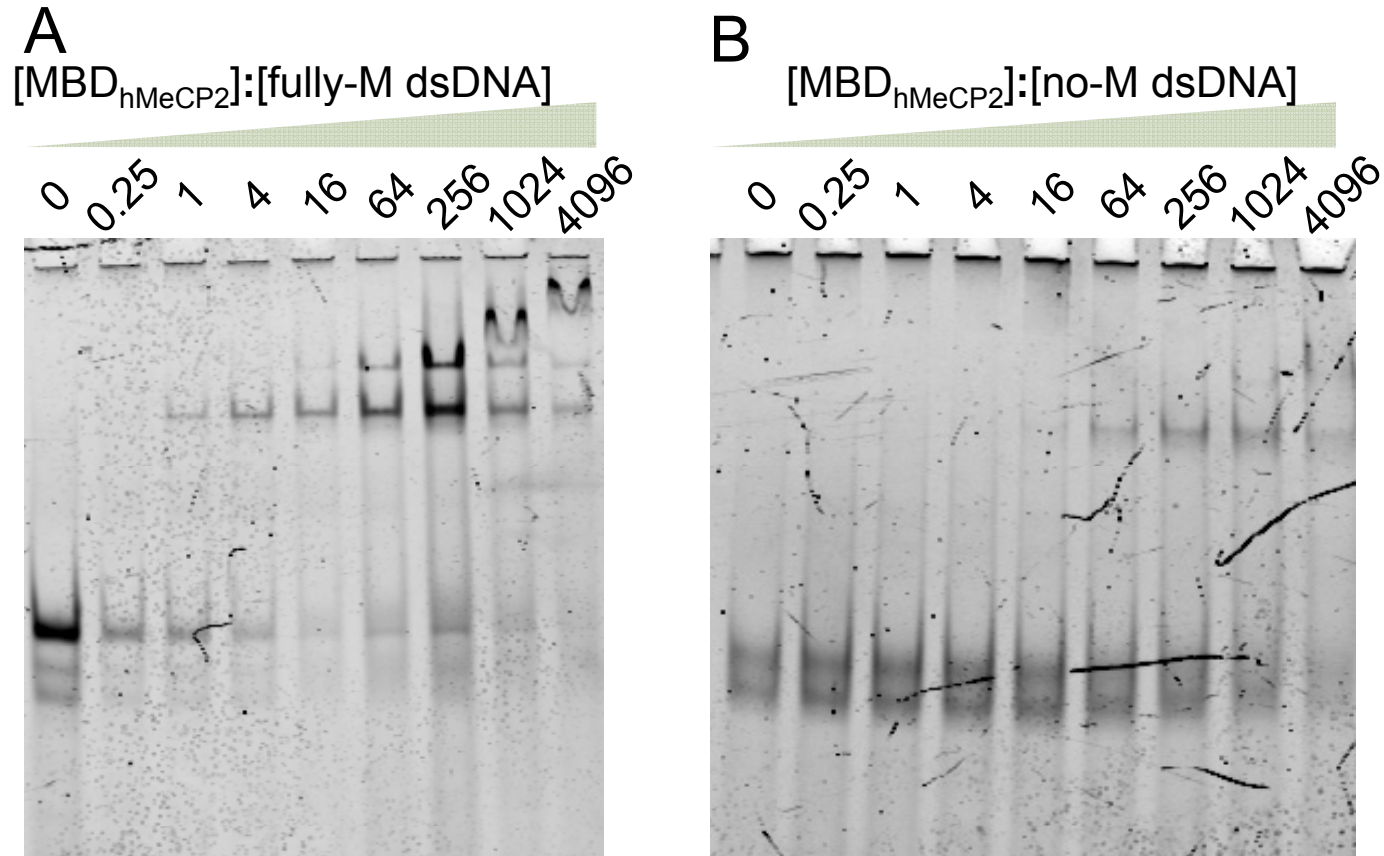

**Figure S16. Titration of MBD<sub>hMeCP2</sub> to fully- and non-methylated DNA**

The protein:DNA molar ratio is from 0.25 to 4096. In **A**) the fully-methylated showed clear shift bands at protein:DNA molar ratio 1, and in **B**) is 64 for non-methylated DNA, which means that MBD<sub>hMeCP2</sub> discriminates fully-methylated DNA from non-methylated DNA by 64 folds.

In comparison with figure S12, the binding affinity for fully-methylated DNA by Tbis1 is about 2-4 folds higher than by MBD<sub>hMeCP2</sub>.

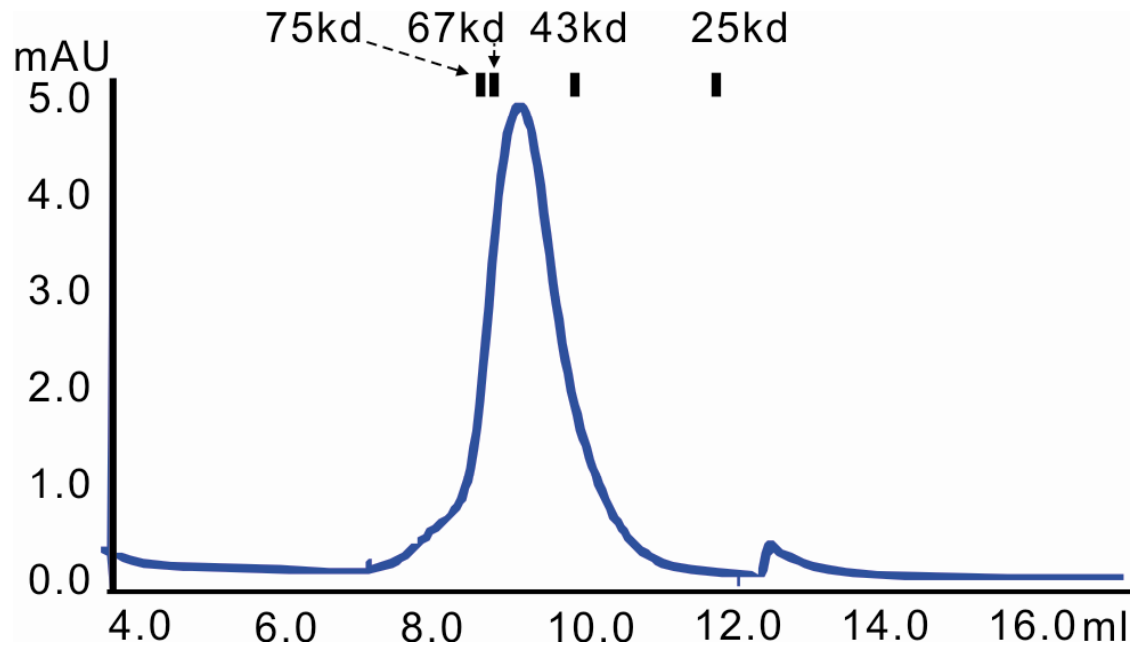

**Figure S17. Determination of Sco5333 absolute molecular weight in free state via Gel filtration**

100  $\mu$ l 0.1 mg/ml Sco5333 or 100  $\mu$ l 0.1 mg/ml Chymotrypsinogen A (25Kd), Ovalbumin (43Kd), Albumin (67Kd), Conalbumin (75Kd) are loaded into the Superdex75 10/300 GL column respectively.

Chromatogram shows that the MW of Sco5333 is ca 2 folds than the monomer MW of Sco5333 which is 34 KD, indicating Sco5333 is a dimer in free state.

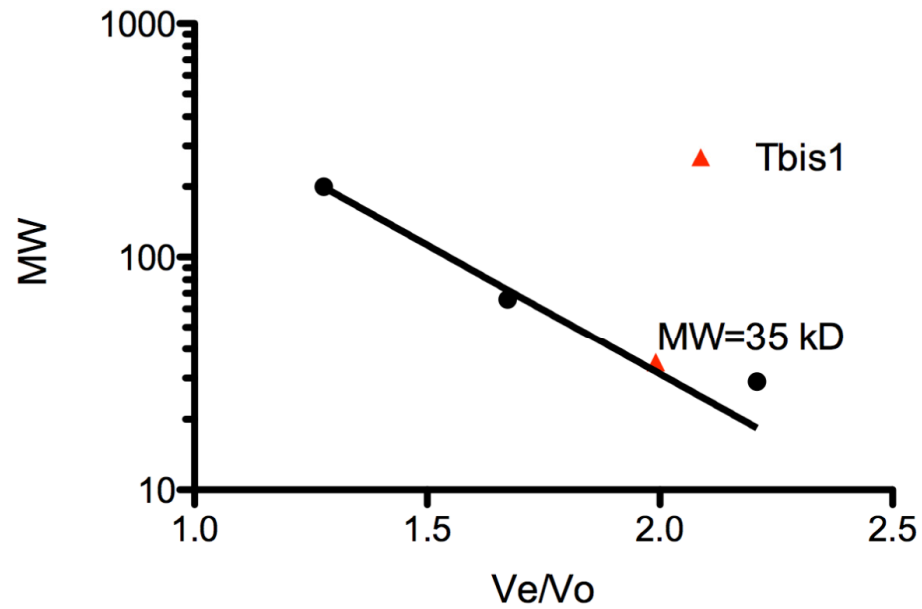

**Figure S18. Determination of Tbis1 absolute molecular weight in free state via Gel filtration**

Curve simulation shows that the MW of Tbis1 in free state is the same as the monomer MW which is 35 kD, indicating Tbis1 is a monomer in free state.

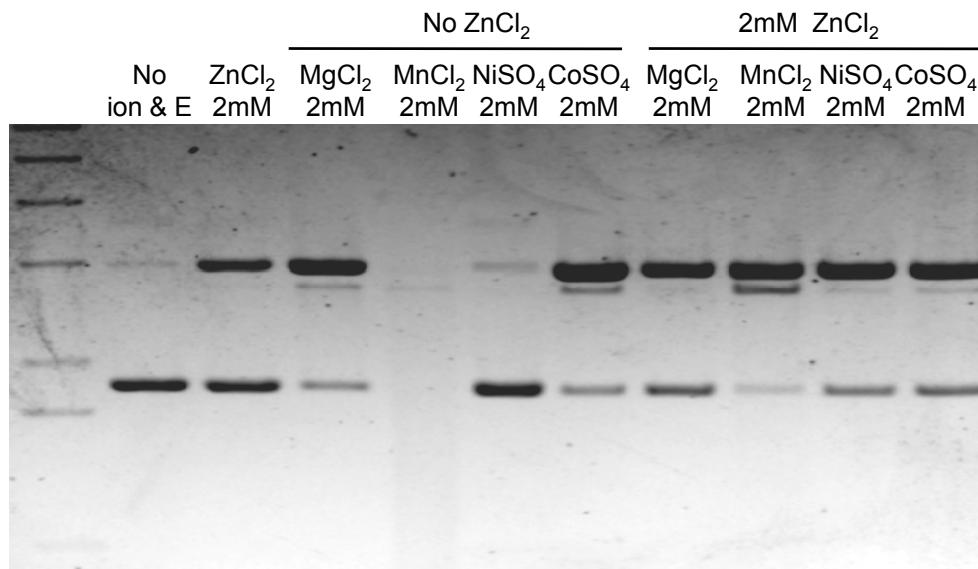

**Figure S19. Single amino acid change of Sco5333<sub>C252D</sub> decreased the suppression of DNA cleavage activity by Zn<sup>2+</sup>**

Sco5333<sub>C252D</sub> which contains a defect CCCD type Zinc Finger(Figure 1C) displays higher cleavage activity than Sco5333 in presence of Mn<sup>2+</sup>, and equal molar of Zn<sup>2+</sup> cannot suppress the activated cleavage activity.

## Supplementary Methods

### Protein Sequence alignment and structure analysis

The protein sequence of SRA domains was aligned by ClustalW software, and the sequence alignment of HNH motifs was achieved by Cobalt (<http://www.ncbi.nlm.nih.gov/tools/cobalt/cobalt.cgi>).

The SRA domain and HNH motif tertiary structure of Sco5333 and Tbis1 were predicted using an on-line server iTASSER (<http://zhanglab.ccmb.med.umich.edu/I-TASSER/>) respectively.

The secondary structure of SRA domains were drawn based on the crystal structure of SRA<sub>UHRF1</sub> (pdb:3CLZ) and SRA<sub>SUVH5</sub> (pdb:3Q0C), and the predicted tertiary structure of SRA<sub>Sco5333</sub> and SRA<sub>Tbis1</sub>. Modelling of protein tertiary structure and superposition were accomplished using the PyMOL software.

### The measurement of growth curve of *E. coli* hosts expressing Sco5333 and its mutants

pJTU4356\* encoding a Sco5333E42G is a spontaneous mutant obtained by introduction of pJTU4356 into the DH10B. The amino acid change of E42G occurred within the SRA domain. *E. coli* BL21/plysS strains harbouring pJTU4356, pJTU4356\* or pJTU4356M were cultured overnight and measured for OD<sub>600</sub> value of the cell density by the Microplate Reader (BioTeK Syngery2). Same amount of cells of each strain was inoculated in 200  $\mu$ L LB at a ratio of V/V=1:100 in the well of microplate supplied with 100  $\mu$ g/mL ampicillin and 34  $\mu$ g/mL chloramphenicol, and were incubated at 30°C in the Reader that shakes once per minute till its OD<sub>600</sub> value reaches or slightly over 0.6. IPTG was then added at a concentration of 0.4 mM, followed by incubation at 30°C for another 9 hours to induce protein expression.

### Electrophoresis mobility shift assay (EMSA) of methylated DNA by Tbis1 and MeCP2

The binding affinity assay for Tbis1 is same as that for DNA cleavage except for exclusion of divalent metal ion in the reaction systems. The reaction mixture was examined by electrophoresis in 1.2% agarose gel for plasmid DNA or native PAGE for oligo DNA. The following 56nt primers were synthesized:

56nt-1: 5'-cggcgtttccgggttccataggctccgctc<sup>m</sup>Cggcctctgatgaccagggcatcaca-3'

56nt-2: 5'-cggcgtttccgggttccataggctccgctccggcctctgatgaccagggcatcaca-3'

56nt-3: 5'-tgtgatgccctggtcatcagagg<sup>m</sup>Cgggagcgggagcctatggaacccggaaacgccg-3'



56nt-4: 5'-tgtgatgccctggtcatcagaggccggagcggagcctatggaacccggaacgccg-3'

56nt-5: 5'-cggcggttccgggtccataggctccgctc<sup>hm</sup>Cggcctctgatgaccagggcatcaca-3'

56nt-6: 5'-tgtgatgccctggtcatcagaggc<sup>hm</sup>Cggagcggagcctatggaacccggaacgccg-3'

Pairs of 56nt-1&3, 1&4, 2&3 and 2&4 were mixed in 1:1 molar ratio and annealed to generate Fully-, Top-, Bottom- and non-methylated double-strand DNA oligos, which were substrates of Tbis1 EMSA assay.

In order to investigate Tbis1 affinity to 5hmC bearing DNA, 56nt-5&6 were mixed in 1:1 molar ratio and annealed to generate Fully-hydroxymethylated double-strand DNA.

For each EMSA reaction, 0.6 pmol double-strand or single-strand oligo DNA and 3pmol Tbis1 were added into the 20 µl binding system mentioned above.

In order to compare the binding affinity of Tbis1 and MBD<sub>hMeCP2</sub> (h stands for human) to fully-methylated and non-methylated DNA, four 66nt primers were synthesized as below:

66nt-1: 5'-aaaacggcggttccgggtccataggctccgcac<sup>m</sup>Cggtctctgatgaccagggcatcacatttt-FAM-3'

66nt-2: 5'-aaaacggcggttccgggtccataggctccgcaccggtctctgatgaccagggcatcacatttt-FAM-3'

66nt-3: 5'-FAM-aaaatgtgatgccctggtcatcagagac<sup>m</sup>Cggtgcggagcctatggaacccggaacgccgtttt-3'

66nt-4: 5'-FAM-aaaatgtgatgccctggtcatcagagaccggtgcggagcctatggaacccggaacgccgtttt-3'

Pairs of 66nt-1&3 and 2&4 were mixed in 1:1 molar ratio and annealed to generate Fully- and non methylated double-strand DNA oligos, which were substrates of MBD<sub>hMeCP2</sub> and Tbis1 EMSA assay.

For each EMSA reaction, 0.6 pmol oligo DNA and 3pmol Tbis1 were added into the 20 µl binding system mentioned above.

#### **EMSA of MBD<sub>mMeCP2</sub>, Sco5333 and its mutants on the 54 nt DNA with one C<sup>m</sup>CGG site**

In order to compare the binding affinity of Sco5333 and MBD<sub>mMeCP2</sub> (m stands for mouse) to fully-methylated, hemi-methylated and non-methylated DNA, the 54nt DNA oligos

(5'-GAAACCCGACAGGACTATAAAGATAC<sup>m</sup>C<sup>m</sup>CGGC<sup>m</sup>CGGCGTTTCCCCCTGGAAGCTCCCTCGT-3')

with replacement of C<sup>m</sup>CAGG into C<sup>m</sup>CGG of 55ntDcm1 was synthesized following the 55ntDcm1 annealing strategy. Four pairs of fully-, hemi- or non-methylated duplexes were generated (Table S3, 54nt-1 to 4) and used for EMSA for Sco5333 and MBD<sub>mMeCP2</sub>. EMSA conditions of Sco5333 to the 54nt fragment were the same as that for 55ntDcm1.

### **Gel filtration to determine the absolute molecular weight of Sco5333 and Tbis1**

For Sco5333 gel filtration, the Superdex 75 10/300 GL column (GE healthcare) was equilibrated with 20mM Tris, pH8.0, 150mM NaCl at 0.4 ml/min through an ÄKTA FPLC (GE Healthcare). 100 µl of 0.1mg/ml Sco5333 and 0.1 mg/ml Chymotrypsinogen A (25 KD), Ovalbumin (43 KD), Albumin (67 KD), Conalbumin (75 KD) were loaded into the column respectively, prior to elution at a flow rate of 0.4ml/min.

For Tbis1, the Superdex 200 10/300GL column (GE healthcare) was equilibrated with 20mM Tris, pH8.0, 150mM NaCl, 1mM EDTA, 1mM DTT and 10% glycerol at 0.5ml/min through an ÄKTA FPLC (GE Healthcare). 250 µl of 0.1mg/ml Tbis1 was loaded into the column prior to the elution at flow rate of 0.5ml/min. Size of the eluted protein peaks were determined by the size exclusion chromatogram of Gel Filtration Markers Kit (Sigma).
